# Supplementary material for: Facile Synthesis of Ag NP Films via Evaporation-Induced Self-Assembly and the BA-Sensing Properties
Source: MDPI journal article supplement (doi:10.3390/foods12061285), 2023-03-17
Supplement: s1 [file s1]

# Supporting Information

## Facile Synthesis of Ag NP Films via Evaporation-Induced Self-Assembly and the BA-Sensing Properties

Jiahang Yu, Huixin Tian, Mingyuan Huang and Xinglian Xu \*

Key Laboratory of Meat Processing and Quality Control, Ministry of Education, National Center of Meat Quality and Safety Control, Jiangsu Collaborative Innovation Center of Meat Production and Processing, Quality and Safety Control, College of Food Science and Technology, Nanjing Agricultural University, Nanjing 210095, China

\* Correspondence: xlxus@njau.edu.cn; Tel.: +86-025 84395939; Fax: +86-025 84395730

Table S1. The amount of chilled broiler meat juice (meat exudate) during the storage of chilled broiler meat under 4 °C and vacuum-packaged conditions. Means within a row followed by different letters are significantly different ( $P < 0.05$ ).

| Chilled Broiler Meat Storage at 4 °C |                         |                         |                          |                           |                          |                          |                          |                         |
|--------------------------------------|-------------------------|-------------------------|--------------------------|---------------------------|--------------------------|--------------------------|--------------------------|-------------------------|
| Exudate (mg/L)                       | 0 Day                   | 2 Day                   | 4 Day                    | 5 Day                     | 6 Day                    | 7 Day                    | 8 Day                    | 10 Day                  |
| Histamine                            | 0.275±0.02 <sup>f</sup> | 0.32±0.024 <sup>f</sup> | 1.44±0.06 <sup>e</sup>   | 1.6±0.07 <sup>d</sup>     | 2.49±0.09 <sup>c</sup>   | 2.43±0.06 <sup>c</sup>   | 3.97±0.14 <sup>b</sup>   | 5.11±0.14 <sup>a</sup>  |
| putrescine                           | 0.02±0.005 <sup>d</sup> | 0.04±0.004 <sup>c</sup> | 0.039±0.002 <sup>c</sup> | 0.041±0.004 <sup>c</sup>  | 0.05±0.002 <sup>b</sup>  | 0.08±0.002 <sup>a</sup>  | 0.079±0.003 <sup>a</sup> | 0.08±0.003 <sup>a</sup> |
| Cadaverine                           | 0                       | 0                       | 0                        | 0.0008±0.001 <sup>d</sup> | 0.001±0.001 <sup>d</sup> | 0.006±0.003 <sup>c</sup> | 0.017±0.005 <sup>b</sup> | 0.03±0.003 <sup>a</sup> |

|                    |                          |                           |                          |                          |                           |                           |                          |                          |
|--------------------|--------------------------|---------------------------|--------------------------|--------------------------|---------------------------|---------------------------|--------------------------|--------------------------|
| Spermine           | 0.057±0.013 <sup>e</sup> | 0.09±0.006 <sup>e</sup>   | 0.217±0.024 <sup>d</sup> | 0.265±0.025 <sup>d</sup> | 0.6±0.05 <sup>c</sup>     | 0.71±0.04 <sup>b</sup>    | 0.72±0.03 <sup>b</sup>   | 0.85±0.028 <sup>a</sup>  |
| Spermidine         | 0.392±0.022 <sup>g</sup> | 0.42±0.045 <sup>g</sup>   | 0.708±0.04 <sup>f</sup>  | 0.798±0.023 <sup>e</sup> | 0.9±0.03 <sup>d</sup>     | 1.08±0.08 <sup>c</sup>    | 1.16±0.07 <sup>b</sup>   | 1.41±0.025 <sup>a</sup>  |
| Benzaldehyde       | 0.218±0.032 <sup>g</sup> | 0.37±0.018 <sup>f</sup>   | 0.47±0.04 <sup>e</sup>   | 0.56±0.04 <sup>d</sup>   | 0.77±0.012 <sup>c</sup>   | 0.83±0.03 <sup>b</sup>    | 0.83±0.035 <sup>b</sup>  | 1.03±0.06 <sup>a</sup>   |
| Phenylacetaldehyde | 0.012±0.002 <sup>g</sup> | 0.018±0.001 <sup>f</sup>  | 0.027±0.002 <sup>e</sup> | 0.039±0.003 <sup>d</sup> | 0.05±0.003 <sup>c</sup>   | 0.05±0.002 <sup>c</sup>   | 0.08±0.002 <sup>b</sup>  | 0.11±0.008 <sup>a</sup>  |
| Cinnamaldehyde     | 0.027±0.001 <sup>a</sup> | 0.025±0.001 <sup>ab</sup> | 0.024±0.002 <sup>b</sup> | 0.018±0.002 <sup>c</sup> | 0.012±0.001 <sup>d</sup>  | 0.014±0.001 <sup>d</sup>  | 0.014±0.001 <sup>d</sup> | 0.012±0.001 <sup>d</sup> |
| Oleic acid         | 1.7±0.04 <sup>a</sup>    | 1.26±0.04 <sup>b</sup>    | 0.26±0.013 <sup>c</sup>  | 0.23±0.008 <sup>c</sup>  | 0.08±0.004 <sup>d</sup>   | 0.06±0.002 <sup>de</sup>  | 0.027±0.002 <sup>e</sup> | 0                        |
| Linoleic acid      | 0.16±0.005 <sup>a</sup>  | 0.13±0.003 <sup>b</sup>   | 0.095±0.003 <sup>c</sup> | 0.053±0.002 <sup>d</sup> | 0.033±0.003 <sup>e</sup>  | 0.03±0.002 <sup>e</sup>   | 0.026±0.001 <sup>f</sup> | 0.024±0.002 <sup>f</sup> |
| Suberic acid       | 0.012±0.001 <sup>d</sup> | 0.014±0.001 <sup>d</sup>  | 0.011±0.001 <sup>d</sup> | 0.07±0.003 <sup>d</sup>  | 0.103±0.01 <sup>d</sup>   | 0.4±0.03 <sup>c</sup>     | 0.89±0.08 <sup>b</sup>   | 1.59±0.2 <sup>a</sup>    |
| 4-Pentenoic acid   | 1.81±0.11 <sup>a</sup>   | 1.7±0.07 <sup>b</sup>     | 1.24±0.04 <sup>c</sup>   | 1.23±0.035 <sup>c</sup>  | 1.08±0.04 <sup>d</sup>    | 0.78±0.06 <sup>e</sup>    | 0.28±0.02 <sup>f</sup>   | 0.24±0.02 <sup>f</sup>   |
| D-Pantothenic acid | 0.159±0.007 <sup>a</sup> | 0.1±0.005 <sup>b</sup>    | 0.084±0.003 <sup>c</sup> | 0.064±0.001 <sup>d</sup> | 0.066±0.003 <sup>d</sup>  | 0.034±0.002 <sup>e</sup>  | 0.016±0.007 <sup>f</sup> | 0.013±0.002 <sup>f</sup> |
| Arabinonic acid    | 14.56±0.14 <sup>h</sup>  | 16.7±0.34 <sup>g</sup>    | 22.087±0.67 <sup>f</sup> | 23.9±0.6 <sup>e</sup>    | 25.93±0.22 <sup>d</sup>   | 27.68±0.4 <sup>c</sup>    | 34.49±0.75 <sup>a</sup>  | 32.79±1.3 <sup>b</sup>   |
| Ferulic acid       | 0.087±0.003 <sup>b</sup> | 0.11±0.01 <sup>a</sup>    | 0.063±0.001 <sup>c</sup> | 0.06±0.002 <sup>c</sup>  | 0.05±0.003 <sup>d</sup>   | 0.033±0.004 <sup>e</sup>  | 0.022±0.002 <sup>f</sup> | 0.022±0.003 <sup>f</sup> |
| Oxyhumulinic acid  | 0.014±0.002 <sup>f</sup> | 0.024±0.002 <sup>d</sup>  | 0.02±0.002 <sup>e</sup>  | 0.02±0.002 <sup>de</sup> | 0.032±0.004 <sup>c</sup>  | 0.031±0.002 <sup>c</sup>  | 0.042±0.02 <sup>b</sup>  | 0.064±0.002 <sup>a</sup> |
| Cucurbitic acid    | 0.09±0.003 <sup>a</sup>  | 0.098±0.007 <sup>a</sup>  | 0.054±0.004 <sup>c</sup> | 0.056±0.004 <sup>c</sup> | 0.073±0.003 <sup>b</sup>  | 0.054±0.002 <sup>c</sup>  | 0.047±0.002 <sup>d</sup> | 0.058±0.002 <sup>c</sup> |
| Capric acid        | 0.09±0.012 <sup>d</sup>  | 0.099±0.01 <sup>cd</sup>  | 0.1±0.008 <sup>bc</sup>  | 0.1±0.006 <sup>bcd</sup> | 0.099±0.004 <sup>cd</sup> | 0.096±0.004 <sup>cd</sup> | 0.12±0.007 <sup>a</sup>  | 0.11±0.01 <sup>ab</sup>  |
| Malic acid         | 329.59±28 <sup>c</sup>   | 383.26±20 <sup>a</sup>    | 353±15.4 <sup>b</sup>    | 173.49±8.1 <sup>d</sup>  | 66.43±2.8 <sup>e</sup>    | 42.24±1.66 <sup>f</sup>   | 42.11±3 <sup>f</sup>     | 31.15±2.3 <sup>f</sup>   |
| Gluconic acid      | 70.87±3.9 <sup>a</sup>   | 69.88±2.3 <sup>a</sup>    | 69.3±2.9 <sup>a</sup>    | 62.64±3.2 <sup>b</sup>   | 47.37±2.98 <sup>c</sup>   | 4.09±0.5 <sup>d</sup>     | 4.02±0.26 <sup>d</sup>   | 3.82±0.3 <sup>d</sup>    |
| Phenylalanine      | 13±0.58 <sup>e</sup>     | 21.41±1.45 <sup>d</sup>   | 22.46±2.6 <sup>d</sup>   | 24.52±3.2 <sup>d</sup>   | 33.4±3.1 <sup>c</sup>     | 38.95±2.33 <sup>b</sup>   | 41.42±2.47 <sup>b</sup>  | 59.77±3.6 <sup>a</sup>   |
| Triacanthine       | 0                        | 0                         | 0                        | 0.016±0.001 <sup>e</sup> | 0.021±0.003 <sup>d</sup>  | 0.051±0.001 <sup>c</sup>  | 0.06±0.002 <sup>a</sup>  | 0.056±0.003 <sup>b</sup> |
| Cystathionine      | 0                        | 0                         | 0                        | 0                        | 0                         | 0.015±0.003 <sup>b</sup>  | 0.017±0.004 <sup>b</sup> | 0.021±0.001 <sup>a</sup> |
| Arginine           | 1.37±0.037 <sup>c</sup>  | 1.49±0.04 <sup>b</sup>    | 1.75±0.03 <sup>a</sup>   | 0.36±0.035 <sup>d</sup>  | 0.31±0.02 <sup>e</sup>    | 0.15±0.007 <sup>f</sup>   | 0                        | 0                        |
| Lysine             | 1.02±0.068 <sup>c</sup>  | 1.95±0.13 <sup>a</sup>    | 1.5±0.04 <sup>b</sup>    | 0.92±0.086 <sup>c</sup>  | 0.73±0.01 <sup>d</sup>    | 0.64±0.003 <sup>d</sup>   | 0.3±0.013 <sup>e</sup>   | 0.284±0.03 <sup>e</sup>  |
| Tryptophan         | 12.2±0.774 <sup>d</sup>  | 13.41±1.6 <sup>d</sup>    | 18.27±0.58 <sup>c</sup>  | 20.74±1.5 <sup>c</sup>   | 42.52±2.5 <sup>b</sup>    | 49.41±3.4 <sup>a</sup>    | 44.4±2.1 <sup>b</sup>    | 51.66±0.22 <sup>a</sup>  |
| Histidine          | 25.2±1.64 <sup>e</sup>   | 27.17±3.4 <sup>de</sup>   | 30.7±1 <sup>cd</sup>     | 34.56±1.72 <sup>c</sup>  | 38.74±1.47 <sup>b</sup>   | 46.8±2.5 <sup>a</sup>     | 48.7±2.9 <sup>a</sup>    | 50.19±4 <sup>a</sup>     |
| Alanine            | 0                        | 0                         | 0                        | 0                        | 0                         | 0                         | 0.01±0.001 <sup>b</sup>  | 0.012±0.002 <sup>a</sup> |
| Proline            | 0.24±0.03 <sup>a</sup>   | 0.204±0.03 <sup>b</sup>   | 0.16±0.004 <sup>c</sup>  | 0.11±0.016 <sup>d</sup>  | 0.09±0.007 <sup>d</sup>   | 0.062±0.005 <sup>e</sup>  | 0.06±0.003 <sup>e</sup>  | 0.06±0.002 <sup>e</sup>  |

|                         |                          |                          |                           |                          |                           |                          |                          |                         |
|-------------------------|--------------------------|--------------------------|---------------------------|--------------------------|---------------------------|--------------------------|--------------------------|-------------------------|
| Glycine                 | 0.013±0.002 <sup>a</sup> | 0.01±0.001 <sup>b</sup>  | 0                         | 0                        | 0                         | 0                        | 0                        | 0                       |
| Methionine              | 0.029±0.002 <sup>a</sup> | 0.023±0.005 <sup>b</sup> | 0.013±0.003 <sup>c</sup>  | 0.01±0.002 <sup>c</sup>  | 0                         | 0                        | 0                        | 0                       |
| Leucine                 | 0.55±0.022 <sup>f</sup>  | 0.84±0.03 <sup>e</sup>   | 0.84±0.05 <sup>e</sup>    | 0.95±0.02 <sup>d</sup>   | 1.34±0.07 <sup>c</sup>    | 1.37±0.05 <sup>c</sup>   | 1.63±0.03 <sup>b</sup>   | 1.8±0.05 <sup>a</sup>   |
| Tyrosine                | 0.93±0.024 <sup>a</sup>  | 0.85±0.04 <sup>b</sup>   | 0.819±0.04 <sup>b</sup>   | 0.83±0.047 <sup>b</sup>  | 0.52±0.01 <sup>c</sup>    | 0.53±0.03 <sup>c</sup>   | 0.42±0.02 <sup>d</sup>   | 0.28±0.01 <sup>e</sup>  |
| L-Glutamate             | 1.02±0.042 <sup>a</sup>  | 0.89±0.04 <sup>b</sup>   | 0.74±0.04 <sup>c</sup>    | 0.626±0.03 <sup>d</sup>  | 0.5±0.01 <sup>e</sup>     | 0.37±0.016 <sup>f</sup>  | 0.22±0.03 <sup>g</sup>   | 0.13±0.02 <sup>h</sup>  |
| L-Valine                | 0.62±0.134 <sup>e</sup>  | 0.58±0.21 <sup>e</sup>   | 1.17±0.3 <sup>d</sup>     | 2.17±0.28 <sup>c</sup>   | 2.46±0.2 <sup>c</sup>     | 2.94±0.3 <sup>b</sup>    | 3.49±0.26 <sup>a</sup>   | 2.46±0.2 <sup>c</sup>   |
| Hypoxanthine            | 35.69±1 <sup>f</sup>     | 39.66±1.56 <sup>e</sup>  | 42.68±0.8 <sup>d</sup>    | 45.78±1.26 <sup>c</sup>  | 47.08±2.2 <sup>c</sup>    | 60.1±2.26 <sup>b</sup>   | 63.9±1.6 <sup>a</sup>    | 61.83±2.2 <sup>ab</sup> |
| Xanthosine              | 11.85±0.53 <sup>d</sup>  | 21.71±1.6 <sup>a</sup>   | 17.29±0.3 <sup>b</sup>    | 17.36±0.7 <sup>b</sup>   | 15.63±0.76 <sup>c</sup>   | 8.21±0.35 <sup>e</sup>   | 0.14±0.02 <sup>f</sup>   | 0.71±0.03 <sup>f</sup>  |
| Adenine                 | 0.07±0.004 <sup>f</sup>  | 0.11±0.004 <sup>f</sup>  | 0.2±0.013 <sup>e</sup>    | 0.26±0.03 <sup>e</sup>   | 0.35±0.005 <sup>d</sup>   | 0.58±0.03 <sup>c</sup>   | 1±0.08 <sup>b</sup>      | 1.9±0.12 <sup>a</sup>   |
| Guanine                 | 0.019±0.003 <sup>f</sup> | 0.032±0.001 <sup>e</sup> | 0.034±0.002 <sup>de</sup> | 0.048±0.004 <sup>c</sup> | 0.07±0.004 <sup>a</sup>   | 0.063±0.002 <sup>b</sup> | 0.038±0.003 <sup>d</sup> | 0.03±0.004 <sup>e</sup> |
| Guanidylic acid         | 17.85±0.5 <sup>b</sup>   | 18.89±0.48 <sup>a</sup>  | 12.72±0.96 <sup>c</sup>   | 4.91±0.47 <sup>e</sup>   | 6.14±0.26 <sup>d</sup>    | 0.21±0.01 <sup>f</sup>   | 0.11±0.05 <sup>f</sup>   | 0.15±0.02 <sup>f</sup>  |
| Uracil                  | 0.136±0.018 <sup>c</sup> | 0.166±0.005 <sup>b</sup> | 0.14±0.004 <sup>c</sup>   | 0.17±0.01 <sup>b</sup>   | 0.2±0.018 <sup>a</sup>    | 0.2±0.008 <sup>a</sup>   | 0.2±0.01 <sup>a</sup>    | 0.21±0.01 <sup>a</sup>  |
| Inosine                 | 0.838±0.027 <sup>b</sup> | 1.23±0.06 <sup>a</sup>   | 0.48±0.02 <sup>cd</sup>   | 0.51±0.01 <sup>c</sup>   | 0.45±0.016 <sup>d</sup>   | 0                        | 0                        | 0                       |
| Indole                  | 0.57±0.16 <sup>e</sup>   | 1.81±0.3 <sup>cd</sup>   | 1.65±0.067 <sup>d</sup>   | 1.68±0.3 <sup>d</sup>    | 2.12±0.1 <sup>bc</sup>    | 2.23±0.13 <sup>b</sup>   | 2.45±0.36 <sup>b</sup>   | 4.29±0.23 <sup>a</sup>  |
| Carnosine               | 0.24±0.03 <sup>bc</sup>  | 0.25±0.008 <sup>b</sup>  | 0.22±0.02b <sup>c</sup>   | 0.21±0.03 <sup>c</sup>   | 0.26±0.02 <sup>b</sup>    | 0.24±0.006 <sup>bc</sup> | 0.23±0.02 <sup>bc</sup>  | 0.38±0.03 <sup>a</sup>  |
| Mytilin A               | 5.98±0.3 <sup>a</sup>    | 5.09±0.3 <sup>b</sup>    | 3.27±0.22 <sup>d</sup>    | 4.26±0.28 <sup>c</sup>   | 4.05±0.3 <sup>c</sup>     | 3.87±0.24 <sup>c</sup>   | 2.76±0.28 <sup>e</sup>   | 1.61±0.1 <sup>f</sup>   |
| Riboflavin (Vitamin B2) | 1.29±0.06 <sup>c</sup>   | 2.66±0.16 <sup>a</sup>   | 1.53±0.03 <sup>c</sup>    | 1.52±0.03 <sup>c</sup>   | 2.31±0.18 <sup>b</sup>    | 1.28±0.26 <sup>c</sup>   | 1.42±0.13 <sup>c</sup>   | 2.45±0.2 <sup>ab</sup>  |
| Glutathione             | 0.44±0.02 <sup>b</sup>   | 0.43±0.03 <sup>b</sup>   | 0.31±0.023 <sup>d</sup>   | 0.4±0.02 <sup>bc</sup>   | 0.38±0.03 <sup>c</sup>    | 0.59±0.03 <sup>a</sup>   | 0.14±0.03 <sup>e</sup>   | 0.11±0.03 <sup>e</sup>  |
| 1-Hexanol               | 0.12±0.002 <sup>e</sup>  | 0.17±0.001 <sup>d</sup>  | 0.21±0.006 <sup>bc</sup>  | 0.23±0.01 <sup>b</sup>   | 0.3±0.03 <sup>a</sup>     | 0.22±0.009 <sup>bc</sup> | 0.2±0.01 <sup>c</sup>    | 0.17±0.006 <sup>d</sup> |
| 2-Methylfuran           | 0.011±0.001 <sup>c</sup> | 0.012±0.001 <sup>c</sup> | 0.011±0.001 <sup>c</sup>  | 0.012±0.001 <sup>c</sup> | 0.013±0.001 <sup>bc</sup> | 0.012±0.001 <sup>c</sup> | 0.016±0.002 <sup>b</sup> | 0.02±0.004 <sup>a</sup> |
